# Supplementary material for: Conformational preferences of chiral molecules: free jet rotational spectrum of 1-phenyl-1-propanol
Source: Royal Society of Chemistry journal article supplement (doi:10.1039/b705114j), 2007-01-01
Supplement: b705114j.pdf [file b705114j.pdf]

---

**Conformational preferences of chiral molecules:  
free jet rotational spectrum of 1-phenyl-1-propanol**

---

Barbara M. Giuliano, Paolo Ottaviani, Laura B. Favero, Walther Caminati,\* Jens-Uwe Grabow,

Anna Giardini and Mauro Satta

**Supplementary Informatio**

**Table 1:** Theoretical structures (B3LYP 6-311++G\*\*, Z-matrices) of the three most stable conformers (T, GE, GZ, see Table 1 of the paper) of 1-phenyl-1-propanol (1PP).

**3) 1PP-T**

|    |   |    |    |    |    |         |         |         |  |
|----|---|----|----|----|----|---------|---------|---------|--|
| 1  | 6 | 12 |    |    |    |         |         |         |  |
| 2  | 6 | 12 | 1  |    |    | 1.39997 |         |         |  |
| 3  | 6 | 12 | 2  | 1  |    | 1.39270 | 120.570 |         |  |
| 4  | 6 | 12 | 3  | 2  | 1  | 1.39526 | 120.251 | 0.247   |  |
| 5  | 6 | 12 | 4  | 3  | 2  | 1.39317 | 119.614 | -0.27   |  |
| 6  | 6 | 12 | 5  | 4  | 3  | 1.39473 | 120.010 | 0.00    |  |
| 7  | 1 | 1  | 2  | 1  | 3  | 1.08417 | 119.272 | 180.808 |  |
| 8  | 1 | 1  | 3  | 2  | 4  | 1.08457 | 119.774 | 179.958 |  |
| 9  | 1 | 1  | 4  | 3  | 5  | 1.08424 | 120.187 | 180.288 |  |
| 10 | 1 | 1  | 5  | 4  | 3  | 1.08445 | 120.121 | 180.441 |  |
| 11 | 1 | 1  | 6  | 5  | 4  | 1.08595 | 119.662 | 180.510 |  |
| 12 | 6 | 12 | 1  | 6  | 5  | 1.51923 | 120.500 | 178.395 |  |
| 13 | 6 | 12 | 12 | 1  | 2  | 1.53256 | 112.421 | 75.518  |  |
| 14 | 6 | 12 | 13 | 12 | 1  | 1.53055 | 113.417 | 175.385 |  |
| 15 | 8 | 16 | 12 | 13 | 1  | 1.43536 | 106.738 | 123.007 |  |
| 16 | 1 | 1  | 15 | 12 | 14 | 0.96293 | 108.422 | 152.094 |  |
| 17 | 1 | 1  | 12 | 13 | 1  | 1.09991 | 108.322 | 240.514 |  |
| 18 | 1 | 1  | 14 | 13 | 15 | 1.09490 | 111.148 | -90.98  |  |
| 19 | 1 | 1  | 13 | 14 | 12 | 1.09482 | 110.267 | 121.156 |  |
| 20 | 1 | 1  | 13 | 14 | 12 | 1.09538 | 110.256 | 238.732 |  |
| 21 | 1 | 1  | 14 | 13 | 15 | 1.09124 | 110.963 | 29.150  |  |
| 22 | 1 | 1  | 14 | 13 | 15 | 1.09337 | 110.732 | 149.405 |  |

**2) 1PP-GE**

|    |   |    |   |   |   |         |         |         |  |
|----|---|----|---|---|---|---------|---------|---------|--|
| 1  | 6 | 12 |   |   |   |         |         |         |  |
| 2  | 6 | 12 | 1 |   |   | 1.40064 |         |         |  |
| 3  | 6 | 12 | 2 | 1 |   | 1.39219 | 120.591 |         |  |
| 4  | 6 | 12 | 3 | 2 | 1 | 1.39586 | 120.237 | 0.120   |  |
| 5  | 6 | 12 | 4 | 3 | 2 | 1.39259 | 119.630 | -0.27   |  |
| 6  | 6 | 12 | 5 | 4 | 3 | 1.39528 | 119.996 | 0.061   |  |
| 7  | 1 | 1  | 2 | 1 | 3 | 1.08431 | 119.318 | 180.705 |  |
| 8  | 1 | 1  | 3 | 2 | 4 | 1.08455 | 119.795 | 180.045 |  |
| 9  | 1 | 1  | 4 | 3 | 5 | 1.08425 | 120.166 | 180.278 |  |
| 10 | 1 | 1  | 5 | 4 | 3 | 1.08444 | 120.135 | 180.392 |  |

Supplementary Material for PCCP

This journal is © The Owner Societies 2007

|    |   |    |    |    |    |         |         |         |
|----|---|----|----|----|----|---------|---------|---------|
| 11 | 1 | 1  | 6  | 5  | 4  | 1.08568 | 119.683 | 180.369 |
| 12 | 6 | 12 | 1  | 6  | 5  | 1.51945 | 120.779 | 179.077 |
| 13 | 6 | 12 | 12 | 1  | 2  | 1.53294 | 113.677 | 70.483  |
| 14 | 6 | 12 | 13 | 12 | 1  | 1.53003 | 113.998 | 64.333  |
| 15 | 8 | 16 | 12 | 13 | 1  | 1.43630 | 105.844 | 122.748 |
| 16 | 1 | 1  | 15 | 12 | 14 | 0.96323 | 108.425 | 178.035 |
| 17 | 1 | 1  | 12 | 13 | 1  | 1.09966 | 108.284 | 239.834 |
| 18 | 1 | 1  | 14 | 13 | 15 | 1.09303 | 111.748 | -69.71  |
| 19 | 1 | 1  | 13 | 14 | 12 | 1.09486 | 110.341 | 122.176 |
| 20 | 1 | 1  | 13 | 14 | 12 | 1.09444 | 110.144 | 239.702 |
| 21 | 1 | 1  | 14 | 13 | 15 | 1.09479 | 111.381 | 50.900  |
| 22 | 1 | 1  | 14 | 13 | 15 | 1.09285 | 110.528 | 170.308 |

**3) 1PP-GZ**

|    |   |    |    |    |    |         |         |         |
|----|---|----|----|----|----|---------|---------|---------|
| 1  | 6 | 12 |    |    |    |         |         |         |
| 2  | 6 | 12 | 1  |    |    | 1.39923 |         |         |
| 3  | 6 | 12 | 2  | 1  |    | 1.39298 | 120.947 |         |
| 4  | 6 | 12 | 3  | 2  | 1  | 1.39440 | 120.033 | -0.64   |
| 5  | 6 | 12 | 4  | 3  | 2  | 1.39351 | 119.511 | 0.032   |
| 6  | 6 | 12 | 5  | 4  | 3  | 1.39458 | 120.328 | 0.366   |
| 7  | 1 | 1  | 2  | 1  | 3  | 1.08617 | 119.500 | 180.118 |
| 8  | 1 | 1  | 3  | 2  | 4  | 1.08448 | 119.849 | 180.643 |
| 9  | 1 | 1  | 4  | 3  | 5  | 1.08421 | 120.221 | 180.356 |
| 10 | 1 | 1  | 5  | 4  | 3  | 1.08461 | 119.995 | 180.273 |
| 11 | 1 | 1  | 6  | 5  | 4  | 1.08360 | 120.073 | 179.881 |
| 12 | 6 | 12 | 1  | 6  | 5  | 1.52224 | 121.686 | 178.598 |
| 13 | 6 | 12 | 12 | 1  | 2  | 1.53836 | 113.641 | 87.201  |
| 14 | 6 | 12 | 13 | 12 | 1  | 1.53027 | 115.212 | 62.695  |
| 15 | 8 | 16 | 12 | 13 | 1  | 1.43232 | 106.800 | 235.422 |
| 16 | 1 | 1  | 15 | 12 | 14 | 0.96300 | 108.501 | 153.924 |
| 17 | 1 | 1  | 12 | 13 | 1  | 1.09910 | 107.051 | 118.645 |
| 18 | 1 | 1  | 14 | 13 | 15 | 1.09187 | 110.990 | 26.681  |
| 19 | 1 | 1  | 13 | 14 | 12 | 1.09515 | 110.077 | 122.124 |
| 20 | 1 | 1  | 13 | 14 | 12 | 1.09503 | 109.666 | 239.403 |
| 21 | 1 | 1  | 14 | 13 | 15 | 1.09333 | 110.176 | 146.190 |
| 22 | 1 | 1  | 14 | 13 | 15 | 1.09273 | 111.669 | 265.820 |
